# Supplementary material for: Injection of antioxidant trace minerals/vitamins into peripartum crossbred cows improves the nutritional and immunological properties of colostrum/milk and the health of their calves under heat stress conditions
Source: Research Square preprint supplement (doi:10.21203/rs.3.rs-3353831/v1), 2023-09-29
Supplement: Supplementary file 1 [file af93a9949fffd395b77b0c3e.docx]

**Supplementary Data**

**Supplementary Table 1.** Cortisol (ng/ml) concentration in colostrum/milk of different groups of Karan Fries cows, i.e. Control (Basal Diet, BD), T1 (BD + Multi-vitamin), T2 (BD + Multi-mineral), and T3 (BD + Multi-vitamin and Multi-minerals) during different days of postpartum in winter and summer seasons.

| **Days/Groups** | **Winter** | | | | | | **Summer** | | | | |
| --- | --- | --- | --- | --- | --- | --- | --- | --- | --- | --- | --- |
| **Control** | **T1** | | **T2** | **T3** | | **Control** | **T1** | | **T2** | **T3** |
| **0** | 6.33±0.88Aa | 5.73±0.83Ab | | 5.53±0.78Ab | 4.20±0.30Ac | | 9.80±1.05Bb | 6.46±0.27Ab | | 5.66±0.31Ab | 4.26±0.08Ab |
| **3** | 4.90±0.51Aa | 3.86±0.59Aab | | 4.06±0.46Aab | 2.90±0.40Ab | | 7.70±0.65Bab | 4.86±0.35Aab | | 3.86±0.66Aab | 3.43±0.28Ab |
| **7** | 3.16±0.41Aa | 3.30±0.25Aab | | 3.26±0.12Aa | 2.50±0.28Aab | | 5.93±0.56Aa | 4.43±0.82Aab | | 3.66±0.41Aa | 3.53±0.17Ab |
| **15** | 2.99±1.10Aa | 2.86±0.59Aa | | 2.83±0.08Aa | 1.50±0.28Aa | | 5.29±0.40Ba | 3.46±0.36Aa | | 3.53±0.38Aa | 2.13±0.43Aa |
| **Overall mean** | **4.34±0.52A** | **3.94±0.41A** | | **3.92±0.36A** | **2.77±0.32B** | | **7.18±0.60C** | **4.80±0.39B** | | **4.18±0.32AB** | **3.34±0.26A** |
| **Tests of Within-Subjects Contrasts** | | | | | | | | | | | |
| **Days * Season** | | | **Days * Group** | | | **Season * Group** | | | **Days * Season * Group** | | |
| ns | | | 0.041 | | | 0.002 | | | ns | | |

Means with different capital superscripts (A, B, C and D) and small superscripts (a, b, c) differ significantly (P<0.05) in a row and in a column of each season, respectively.

**Supplementary Table 2.** Cortisol (ng/ml) concentration in the blood plasma of calves born to different groups of Karan Fries cows, i.e. Control (Basal Diet, BD), T1 (BD + Multi-vitamin), T2 (BD + Multi-mineral), and T3 (BD + Multi-vitamin and Multi-minerals) during different days of postpartum in winter and summer seasons.

| **Days/Groups** | **Winter** | | | | | | **Summer** | | | | |
| --- | --- | --- | --- | --- | --- | --- | --- | --- | --- | --- | --- |
| **Control** | **T1** | | **T2** | **T3** | | **Control** | **T1** | | **T2** | **T3** |
| **0** | 17.00±1.15Ab | 17.30±1.85Ac | | 17.30±0.88Ac | 13.60±0.66Ac | | 20.60±2.33Ac | 21.30±1.20Ac | | 18.60±1.76Ac | 14.60±1.20Ab |
| **3** | 14.60±0.33Cc | 12.30±0.33BCb | | 11.60±0.88Bb | 6.66±0.66Ab | | 18.30±1.45Cbc | 13.60±1.76BCb | | 12.00±1.00BCb | 7.66±0.88Aa |
| **7** | 8.33±0.66Bb | 7.66±1.20Ba | | 7.33±0.88Ba | 3.16±0.16Aa | | 12.00±1.73Bab | 8.66±1.76ABab | | 8.50±1.44ABab | 4.66±0.88Aa |
| **15** | 4.66±0.66Aa | 4.66±0.33Aa | | 4.66±0.66Aa | 3.00±0.57Aa | | 5.50±0.86Aa | 5.66±1.20Aa | | 5.00±0.57Aa | 4.33±0.88Aa |
| **Overall mean** | **11.10±1.51B** | **10.50±1.52B** | | **10.20±1.48B** | **6.62±1.32A** | | **14.10±1.91C** | **12.30±1.90BC** | | **11.00±1.61B** | **7.83±1.31A** |
| **Tests of Within-Subjects Contrasts** | | | | | | | | | | | |
| **Days * Season** | | | **Days * Group** | | | **Season * Group** | | | **Days * Season * Group** | | |
| ns | | | 0.011 | | | 0.001 | | | ns | | |

Means with different capital superscripts (A, B, C and D) and small superscripts (a, b, c) differ significantly (P<0.05) in a row and in a column of each season, respectively.

**Supplementary Table 3.** Insulin like growth factor 1 (IGF1) (ng/ml) concentration in colostrum/milk of different groups of Karan Fries cows, i.e. Control (Basal Diet, BD), T1 (BD + Multi-vitamin), T2 (BD + Multi-mineral), and T3 (BD + Multi-vitamin and Multi-minerals) during different days of postpartum in winter and summer seasons.

| **Days/Groups** | **Winter** | | | | | | **Summer** | | | | |
| --- | --- | --- | --- | --- | --- | --- | --- | --- | --- | --- | --- |
| **Control** | **T1** | | **T2** | **T3** | | **Control** | **T1** | | **T2** | **T3** |
| **0** | 318±23.86Ad | 420.33±26.93Ad | | 398.66±38.25Ad | 551.66±19.53Bd | | 238.33±19.88Ad | 347.00±21.54Bd | | 395.66±20.99BCd | 444.00±22.74Cd |
| **3** | 223±15.94Ac | 231.66±15.98Ac | | 252.00±16.25Ac | 386.00±18.7Bc | | 143.00±9.53Ac | 225.33±11.05Bc | | 224.33±15.30Bc | 254.33±15.37Bc |
| **7** | 92.00±8.14ABb | 72.33±8.35Ab | | 114.66±8.76Bb | 127.66±9.56Bb | | 58.33±4.48Ab | 86.33±3.52ABb | | 104.16±3.60Cb | 108.66±12.87Cb |
| **15** | 5.83±1.01Aa | 5.70±0.70Aa | | 5.66±0.44Aa | 5.83±1.01Aa | | 4.90±0.45Aa | 6.13±0.56Aa | | 6.50±0.76Aa | 5.33±0.72Aa |
| **Overall Mean** | 159.70±36.65A | 182.50±48.72AB | | 192.75±45.38B | 267.79±64.74C | | 111.14±27.08A | 166.20±39.71B | | 182.66±44.12BC | 203.08±50.11C |
| **Tests of Within-Subjects Contrasts** | | | | | | | | | | | |
| **Days * Season** | | | **Days * Group** | | | **Season * Group** | | | **Days * Season * Group** | | |
| **0.001** | | | **0.001** | | | **ns** | | | **ns** | | |

Means with different capital superscripts (A, B, C and D) and small superscripts (a, b, c) differ significantly (P<0.05) in a row and in a column of each season, respectively.

**Supplementary Table 4.** Insulin like growth factor 1 (IGF1) (ng/ml) concentration in the blood plasma of calves born to different groups of Karan Fries cows, i.e. Control (Basal Diet, BD), T1 (BD + Multi-vitamin), T2 (BD + Multi-mineral), and T3 (BD + Multi-vitamin and Multi-minerals) during different days of postpartum in winter and summer seasons.

| **Days/Groups** | **Winter** | | | | | | **Summer** | | | | |
| --- | --- | --- | --- | --- | --- | --- | --- | --- | --- | --- | --- |
| **Control** | **T1** | | **T2** | **T3** | | **Control** | **T1** | | **T2** | **T3** |
| **0** | 196.00±14.10Aa | 194.33±18.55Aa | | 186.66±11.89Aa | 216.33±17.89Aa | | 120.33±5.925Aa | 173.66±9.59Ba | | 200.66±7.53BCa | 231.33±14.62Ca |
| **3** | 299.33±15.64Ab | 252.66±20.49Aa | | 249.33±9.90Aab | 286.33±17.37Aab | | 186.33±8.66Ab | 228.66±7.96Ab | | 217.00±8.386Aa | 284.33±18.34Bab |
| **7** | 239.33±27.26Aab | 249.66±19.32Aa | | 269.00±18.71Ab | 317.33±27.84Ab | | 119.33±7.35Aa | 236.66±14.16Bb | | 240.66±9.597Ba | 345.66±20.86Cb |
| **15** | 263.66±16.50Aab | 274.66±12.34Aa | | 282.66±21.94Ab | 337.66±24.67Ab | | 240.33±13.64Ac | 236.33±6.66Ab | | 284.33±14.19ABb | 322.00±17.78Bb |
| **Overall mean** | **249.58±13.95A** | **242.83±11.76A** | | **246.91±13.09A** | **289.41±16.83B** | | **166.58±15.74A** | **218.83±8.99B** | | **235.66±10.45B** | **295.83±15.12C** |
| **Tests of Within-Subjects Contrasts** | | | | | | | | | | | |
| **Days * Season** | | | **Days * Group** | | | **Season * Group** | | | **Days * Season * Group** | | |
| 0.001 | | | 0.005 | | | ns | | | ns | | |

Means with different capital superscripts (A, B, C and D) and small superscripts (a, b, c) differ significantly (P<0.05) in a row and in a column of each season, respectively.

**Supplementary Table 5.** Total immunoglobulins (TIG) (mg/ml) concentration in colostrum/milk of different groups of Karan Fries cows, i.e. Control (Basal Diet, BD), T1 (BD + Multi-vitamin), T2 (BD + Multi-mineral), and T3 (BD + Multi-vitamin and Multi-minerals) during different days of postpartum in winter and summer seasons.

| **Days/Groups** | **Winter** | | | | | | **Summer** | | | | |
| --- | --- | --- | --- | --- | --- | --- | --- | --- | --- | --- | --- |
| **Control** | **T1** | | **T2** | **T3** | | **Control** | **T1** | **T2** | | **T3** |
| **0** | 68.66±2.40Ad | 64.66±2.33Ad | | 62.33±1.45Ad | 81.66±2.96Bd | | 45.33±2.02Ad | 61.33±2.96Bd | 59.66±3.71Bc | | 77.33±5.04Cc |
| **1** | 22.16±1.87Ac | 19.66±2.02Ac | | 20.16±1.45Ac | 26.33±1.74Ac | | 14.16±1.01Ac | 17.33±0.88ABc | 18.33±1.33ABb | | 22.33±1.76Bb |
| **3** | 10.16±1.48Ab | 8.966±0.51Ab | | 7.66±1.01Ab | 11.83±1.09Ab | | 5.33±0.88Ab | 7.66±0.72ABb | 6.66±0.66ABa | | 10.33±1.33Ba |
| **7** | 0.17±0.02Aa | 0.22±0.04ABa | | 0.23±0.09ABa | 0.44±0.03Ba | | 0.12±0.01Aa | 0.18±0.02ABa | 0.18±0.01ABa | | 0.24±0.02Ba |
| **15** | 0.16±0.02Aa | 0.24±0.03ABa | | 0.32±0.03BCa | 0.38±0.02Ca | | 0.11±0.00Aa | 0.18±0.01Ba | 0.25±0.02Ca | | 0.18±0.01Ba |
| **Overall mean** | **20.26±6.84A** | **18.75±6.44A** | | **18.14±6.22A** | **24.13±8.12B** | | **13.01±4.55A** | **17.33±6.13B** | **17.02±6.00B** | | **22.08±7.75C** |
| **Tests of Within-Subjects Contrasts** | | | | | | | | | | | |
| **Days * Season** | | | **Days * Group** | | | **Season * Group** | | | | **Days * Season * Group** | |
| 0.001 | | | 0.001 | | | 0.003 | | | | 0.003 | |

Means with different capital superscripts (A, B, C and D) and small superscripts (a, b, c) differ significantly (P<0.05) in a row and in a column of each season, respectively.

**Supplementary Table 6.** Total immunoglobulins (TIG) (mg/ml) concentration in the blood plasma of calves born to different groups of Karan Fries cows, i.e. Control (Basal Diet, BD), T1 (BD + Multi-vitamin), T2 (BD + Multi-mineral), and T3 (BD + Multi-vitamin and Multi-minerals) during different days of postpartum in winter and summer seasons.

| **Days/Groups** | **Winter** | | | | | | **Summer** | | | | |
| --- | --- | --- | --- | --- | --- | --- | --- | --- | --- | --- | --- |
| **Control** | **T1** | | **T2** | **T3** | | **Control** | **T1** | | **T2** | **T3** |
| **0** | 25.33±1.85Ab | 25±1.52Aa | | 30.43±2.52ABb | 35.16±1.92Bbc | | 19.33±1.45Aa | 23.16±1.92Ab | | 31.16±2.18Bc | 32.66±1.66Bb |
| **1** | 24.66±2.02Ab | 23.66±1.20Aa | | 28.33±1.76Ab | 38.33±1.76Bc | | 17.83±1.48Aa | 20.66±1.20ABb | | 26.33±1.76Bbc | 33.66±1.45Cb |
| **3** | 20.16±1.74Aab | 20.66±1.45Aa | | 29.16±1.42Bb | 32.33±1.76Babc | | 16.66±1.20Aa | 18.16±2.04Aab | | 26.16±1.58Bbc | 28.33±2.02Bab |
| **7** | 22.66±1.30ABb | 20.50±1.89Aa | | 25.66±1.45ABab | 29.83±2.08Bab | | 18.33±1.45Aa | 17.33±1.76Aab | | 22.33±1.36ABb | 27.33±1.20Bab |
| **15** | 15.33±0.88Aa | 21.33±2.02ABa | | 19.83±1.58ABa | 26.16±1.64Ba | | 14.16±1.45Aa | 13.33±0.88Aa | | 14.16±1.45Aa | 22.66±1.66Ba |
| **Overall mean** | **21.63±1.14A** | **22.23±0.78A** | | **26.68±1.21B** | **32.36±1.32C** | | **17.26±0.71A** | **18.53±1.07A** | | **24.03±1.64B** | **28.93±1.22C** |
| **Tests of Within-Subjects Contrasts** | | | | | | | | | | | |
| **Days * Season** | | | **Days * Group** | | | **Season * Group** | | | **Days * Season * Group** | | |
| ns | | | 0.004 | | | ns | | | 0.017 | | |

Means with different capital superscripts (A, B, C and D) and small superscripts (a, b, c) differ significantly (P<0.05) in a row and in a column of each season, respectively.

**Supplementary Table 7.** Immunoglobulin G (IgG) (mg/ml) concentration in colostrum/milk of different groups of Karan Fries cows, i.e. Control (Basal Diet, BD), T1 (BD + Multi-vitamin), T2 (BD + Multi-mineral), and T3 (BD + Multi-vitamin and Multi-minerals) during different days of postpartum in winter and summer seasons.

| **Days/Groups** | **Winter** | | | | | | **Summer** | | | | |
| --- | --- | --- | --- | --- | --- | --- | --- | --- | --- | --- | --- |
| **Control** | **T1** | | **T2** | **T3** | | **Control** | **T1** | **T2** | | **T3** |
| **0** | 58.33±1.76Ad | 63.00±3.60ABc | | 65.66±3.17ABd | 72.00±2.08Bd | | 43.33±1.85Ad | 48.66±2.72Ad | 60.66±2.33Bd | | 75.66±2.90Cd |
| **1** | 17.66±1.66Ac | 16.66±1.20Ab | | 23.66±1.76Bc | 24.33±0.88Ac | | 14.00±1.15Ac | 14.16±0.92Ac | 21.33±1.76Bc | | 20.10±1.46Bc |
| **3** | 8.33±1.20ABb | 7.00±1.15Aa | | 9.33±1.33ABb | 13.33±1.33Bb | | 6.33±0.88Ab | 5.83±0.60Ab | 7.63±0.87Ab | | 9.16±1.46Ab |
| **7** | 0.28±0.02Aa | 0.18±0.02Aa | | 0.14±0.02Aa | 0.53±0.08Ba | | 0.19±0.00ABa | 0.11±0.00Aa | 0.20±0.02ABa | | 0.23±0.03Ba |
| **15** | 0.15±0.03Aa | 0.15±0.00Aa | | 0.16±0.02Aa | 0.24±0.02Aa | | 0.13±0.01Aa | 0.16±0.02Aa | 0.13±0.02Aa | | 0.21±0.04Aa |
| **Overall mean** | **16.95±5.80A** | **17.40±6.33AB** | | **19.79±6.57BC** | **22.08±7.09C** | | **12.79±4.31A** | **13.78±4.88A** | **17.99±6.08B** | | **21.07±7.57B** |
| **Tests of Within-Subjects Contrasts** | | | | | | | | | | | |
| **Days * Season** | | | **Days * Group** | | | **Season * Group** | | | | **Days * Season * Group** | |
| 0.001 | | | 0.001 | | | 0.001 | | | | 0.001 | |

Means with different capital superscripts (A, B, C and D) and small superscripts (a, b, c) differ significantly (P<0.05) in a row and in a column of each season, respectively.

**Supplementary Table 8.** Immunoglobulin G (IgG) (mg/ml) concentration in the blood plasma of calves born to different groups of Karan Fries cows, i.e. Control (Basal Diet, BD), T1 (BD + Multi-vitamin), T2 (BD + Multi-mineral), and T3 (BD + Multi-vitamin and Multi-minerals) during different days of postpartum in winter and summer seasons.

| **Days/Groups** | **Winter** | | | | | | **Summer** | | | | |
| --- | --- | --- | --- | --- | --- | --- | --- | --- | --- | --- | --- |
| **Control** | **T1** | | **T2** | **T3** | | **Control** | **T1** | | **T2** | **T3** |
| **0** | 24.60±0.88Ac | 26.00±2.08Ab | | 25.66±0.88Ac | 34.60±2.02Ac | | 20.66±1.20Ab | 21.83±1.30Ab | | 21.50±1.04Ac | 32.66±2.33Bc |
| **1** | 17.50±0.76Aab | 20.66±1.85Aab | | 21.33±1.20Ab | 26.83±1.16Bb | | 14.50±1.80Aa | 20.16±0.72Bb | | 19.66±1.20Bbc | 24.16±0.92Bb |
| **3** | 19.50±0.86Ab | 17.60±0.88Aa | | 17.30±0.88Aa | 23.66±1.20Bb | | 13.60±0.72Aa | 15.60±0.88ABa | | 17.83±0.88Bbc | 21.66±1.20Cb |
| **7** | 17.83±0.60Aab | 17.16±0.60Aa | | 17.20±0.41Aa | 22.16±1.42Bab | | 14.00±1.04Aa | 15.83±0.72Aa | | 16.66±0.88Ab | 21.33±1.01Bb |
| **15** | 15.80±0.72Aa | 15.33±0.88Aa | | 14.83±0.44Aa | 17.10±1.58Aa | | 12.83±0.92Aa | 13.33±0.88Aa | | 12.80±0.60Aa | 14.80±0.60Aa |
| **Overall mean** | **19.06±0.86A** | **19.36±1.12A** | | **19.27±1.06A** | **24.9±1.65B** | | **15.13±0.87A** | **17.36±0.90B** | | **17.7±0.86B** | **22.93±1.62C** |
| **Tests of Within-Subjects Contrasts** | | | | | | | | | | | |
| **Days * Season** | | | **Days * Group** | | | **Season * Group** | | | **Days * Season * Group** | | |
| ns | | | 0.001 | | | 0.019 | | | ns | | |

Means with different capital superscripts (A, B, C and D) and small superscripts (a, b, c) differ significantly (P<0.05) in a row and in a column of each season, respectively.

**Supplementary Table 9.** Milk yield (Kg) of different groups of Karan Fries cows, i.e. Control (Basal Diet, BD), T1 (BD + Multi-vitamin), T2 (BD + Multi-mineral), and T3 (BD + Multi-vitamin and Multi-minerals) during different days of postpartum in winter and summer seasons.

| **Days/Groups** | **Winter** | | | | | | **Summer** | | | | |
| --- | --- | --- | --- | --- | --- | --- | --- | --- | --- | --- | --- |
| **Control** | **T1** | | **T2** | **T3** | | **Control** | **T1** | | **T2** | **T3** |
| **0** | 8.33±1.33Aa | 9.00±1.52Aa | | 9.66±0.76Aa | 13.00±1.52Aa | | 7.33±0.88Aa | 6.33±0.88Aa | | 7.66±1.20Ab | 8.33±1.33Aa |
| **7** | 11.16±1.16Aa | 13.00±1.15ABab | | 16.13±1.03ABb | 16.66±1.76Aa | | 9.33±0.88Aa | 9.33±1.33Aab | | 12.33±0.88Aab | 11.41±0.82Aab |
| **15** | 12.66±0.88Aa | 14.33±0.88ABb | | 16.47±1.27ABb | 19.33±2.33Ba | | 9.66±1.66Aa | 12.66±1.20Ab | | 14.63±1.66Ab | 13.33±1.45Aab |
| **30** | 12.83±0.92Aa | 15.33±1.20Ab | | 16.66±0.88ABb | 20.66±1.45Ba | | 10.60±1.20Aa | 13.33±1.45Ab | | 13.66±1.20Ab | 15.66±1.20Ab |
| **Overall mean** | **11.25±0.71A** | **12.91±0.89AB** | | **14.75±0.98B** | **17.41±1.17C** | | **9.25±0.62A** | **10.41±0.99AB** | | **12.08±0.97B** | **12.18±0.96B** |
| **Tests of Within-Subjects Contrasts** | | | | | | | | | | | |
| **Days * Season** | | | **Days * Group** | | | **Season * Group** | | | **Days * Season * Group** | | |
| **ns** | | | **ns** | | | **0.022** | | | ns | | |

Means with different capital (A, B, C and D) and small superscripts (a, b, c) differ significantly (P<0.05) in a row and in a column of each season, respectively.

**Supplementary Table 10.** Somatic cell count (SCC) (x103 cells/ml) in colostrum/milk of different groups of Karan Fries cows, i.e. Control (Basal Diet, BD), T1 (BD + Multi-vitamin), T2 (BD + Multi-mineral), and T3 (BD + Multi-vitamin and Multi-minerals) during different days of postpartum in winter and summer seasons.

| **Days/Groups** | **Winter** | | | | | | **Summer** | | | | |
| --- | --- | --- | --- | --- | --- | --- | --- | --- | --- | --- | --- |
| **Control** | **T1** | | **T2** | **T3** | | **Control** | **T1** | | **T2** | **T3** |
| **0** | 618.33±25.22Ad | 657.00±44.37Ab | | 710.33±32.05Ab | 578.00±41.07Ab | | 831.66±80.20Bb | 666.66±61.24ABb | | 736.33±55.89ABb | 527.33±41.63Ab |
| **7** | 454.00±21.00Bc | 273.00±24.70Aa | | 289.33±39.98Aa | 248.66±15.98Aa | | 675.33±46.42Bab | 257.66±30.56Aa | | 356.66±39.29Aa | 215.66±9.905Aa |
| **15** | 352.66±24.93Bb | 241.33±25.07Aa | | 229.33±17.85Aa | 216.00±17.03Aa | | 648.00±64.15Bab | 233.00±28.29Aa | | 225.66±42.11Aa | 184.66±25.20Aa |
| **30** | 255.00±12.12Aa | 197.00±19.42Aa | | 206.33±26.11Aa | 175.33±14.19Aa | | 559.00±37.89Ba | 234.66±21.66Aa | | 209.66±21.33Aa | 138.00±14.57Aa |
| **Overall mean** | **420.00±41.54B** | **342.08±56.87A** | | **358.83±63.18A** | **304.5±49.38A** | | **678.50±39.01C** | **348.00±57.93AB** | | **382.08±66.42B** | **266.41±47.47A** |
| **Tests of Within-Subjects Contrasts** | | | | | | | | | | | |
| **Days * Season** | | | **Days * Group** | | | **Season * Group** | | | **Days * Season * Group** | | |
| 0.001 | | | 0.001 | | | ns | | | ns | | |

Means with different capital superscripts (A, B, C and D) and small superscripts (a, b, c) differ significantly (P<0.05) in a row and in a column of each season, respectively.

**Supplementary Table 11.** Body weight (Kgs) of calves born to different groups of Karan Fries cows, i.e. Control (Basal Diet, BD), T1 (BD + Multi-vitamin), T2 (BD + Multi-mineral), and T3 (BD + Multi-vitamin and Multi-minerals) during different days of postpartum in winter and summer seasons.

| **Days/Groups** | **Winter** | | | | | | **Summer** | | | | |
| --- | --- | --- | --- | --- | --- | --- | --- | --- | --- | --- | --- |
| **Control** | **T1** | | **T2** | **T3** | | **Control** | **T1** | | **T2** | **T3** |
| **0** | 29.50±1.44Aa | 32.33±2.02Aa | | 31.00±2.51Aa | 34.33±2.84Aa | | 27.33±1.85Aa | 31.33±1.45Aa | | 31.00±2.08Aa | 32.33±1.45Aa |
| **7** | 33.66±2.60Aab | 35.33±1.85Aab | | 34.33±1.45Aa | 40.66±3.17Aab | | 29.33±2.40Aab | 34.66±1.45Aa | | 35.00±2.30Aab | 35.66±2.02Aab |
| **15** | 38.33±3.28Aab | 39.33±2.84Aab | | 38.66±2.18Aab | 47.33±2.33Ab | | 32.33±2.02Aab | 39.66±2.72Aab | | 38.33±2.90Aab | 41.00±2.30Abc |
| **30** | 42.00±2.88Ab | 44.33±2.40Ab | | 45.00±2.08Ab | 51.33±2.18Bb | | 36.33±1.33Ab | 45.33±2.02Bb | | 43.66±1.66Bb | 44.66±2.02Bc |
| **Overall mean** | **35.87±1.81A** | **37.83±1.67A** | | **37.25±1.81A** | **43.41±2.26B** | | **31.33±1.31A** | **37.75±1.80B** | | **37.00±1.70B** | **38.41±1.66 B** |
| **Tests of Within-Subjects Contrasts** | | | | | | | | | | | |
| **Days * Season** | | | **Days * Group** | | | **Season * Group** | | | **Days * Season * Group** | | |
| ns | | | ns | | | ns | | | ns | | |

Means with different capital superscripts (A, B, C and D) and small superscripts (a, b, c) differ significantly (P<0.05) in a row and in a column of each season, respectively.
